# Supplementary material for: Simultaneous structure–activity studies and arming of natural products by C–H amination reveal cellular targets of eupalmerin acetate
Source: Springer Nature journal article supplement (doi:10.1038/nchem.1653), 2013-05-17
Supplement: 41557_2013_BFnchem1653_MOESM1_ESM.mol [file 41557_2013_BFnchem1653_MOESM1_ESM.mol]

  ChemDraw05161312402D

 16 15  0  0  0  0  0  0  0  0999 V2000
   -2.1434   -0.8250    0.0000 C   0  0  0  0  0  0  0  0  0  0  0  0
   -1.4289   -1.2375    0.0000 N   0  0  0  0  0  0  0  0  0  0  0  0
   -0.7145   -0.8250    0.0000 C   0  0  0  0  0  0  0  0  0  0  0  0
   -0.0000   -1.2375    0.0000 C   0  0  0  0  0  0  0  0  0  0  0  0
    0.7145   -0.8250    0.0000 C   0  0  0  0  0  0  0  0  0  0  0  0
   -0.7145    0.0000    0.0000 O   0  0  0  0  0  0  0  0  0  0  0  0
    0.7145    0.0000    0.0000 O   0  0  0  0  0  0  0  0  0  0  0  0
   -2.1434    0.0000    0.0000 C   0  0  0  0  0  0  0  0  0  0  0  0
   -1.4289    0.4125    0.0000 C   0  0  0  0  0  0  0  0  0  0  0  0
   -1.4289    1.2375    0.0000 C   0  0  0  0  0  0  0  0  0  0  0  0
   -0.7145    1.6500    0.0000 C   0  0  0  0  0  0  0  0  0  0  0  0
   -0.0000    2.0625    0.0000 C   0  0  0  0  0  0  0  0  0  0  0  0
    1.4289   -1.2375    0.0000 C   0  0  0  0  0  0  0  0  0  0  0  0
    1.4289   -2.0625    0.0000 Cl  0  0  0  0  0  0  0  0  0  0  0  0
    2.1434   -1.6500    0.0000 Cl  0  0  0  0  0  0  0  0  0  0  0  0
    2.1434   -0.8250    0.0000 Cl  0  0  0  0  0  0  0  0  0  0  0  0
  1  2  1  0      
  2  3  1  0      
  3  4  1  0      
  4  5  1  0      
  5 13  1  0      
  3  6  2  0      
  5  7  1  1      
  1  8  1  0      
  8  9  1  0      
  9 10  1  0      
 10 11  1  0      
 11 12  3  0      
 13 14  1  0      
 13 15  1  0      
 13 16  1  0      
M  END
